# Supplementary material for: Associations between consumption of three types of beverages and risk of cardiometabolic multimorbidity in UK Biobank participants: a prospective cohort study
Source: PubMed Central journal article supplement (PMC9386995; doi:10.1186/s12916-022-02456-4), 2022-08-18

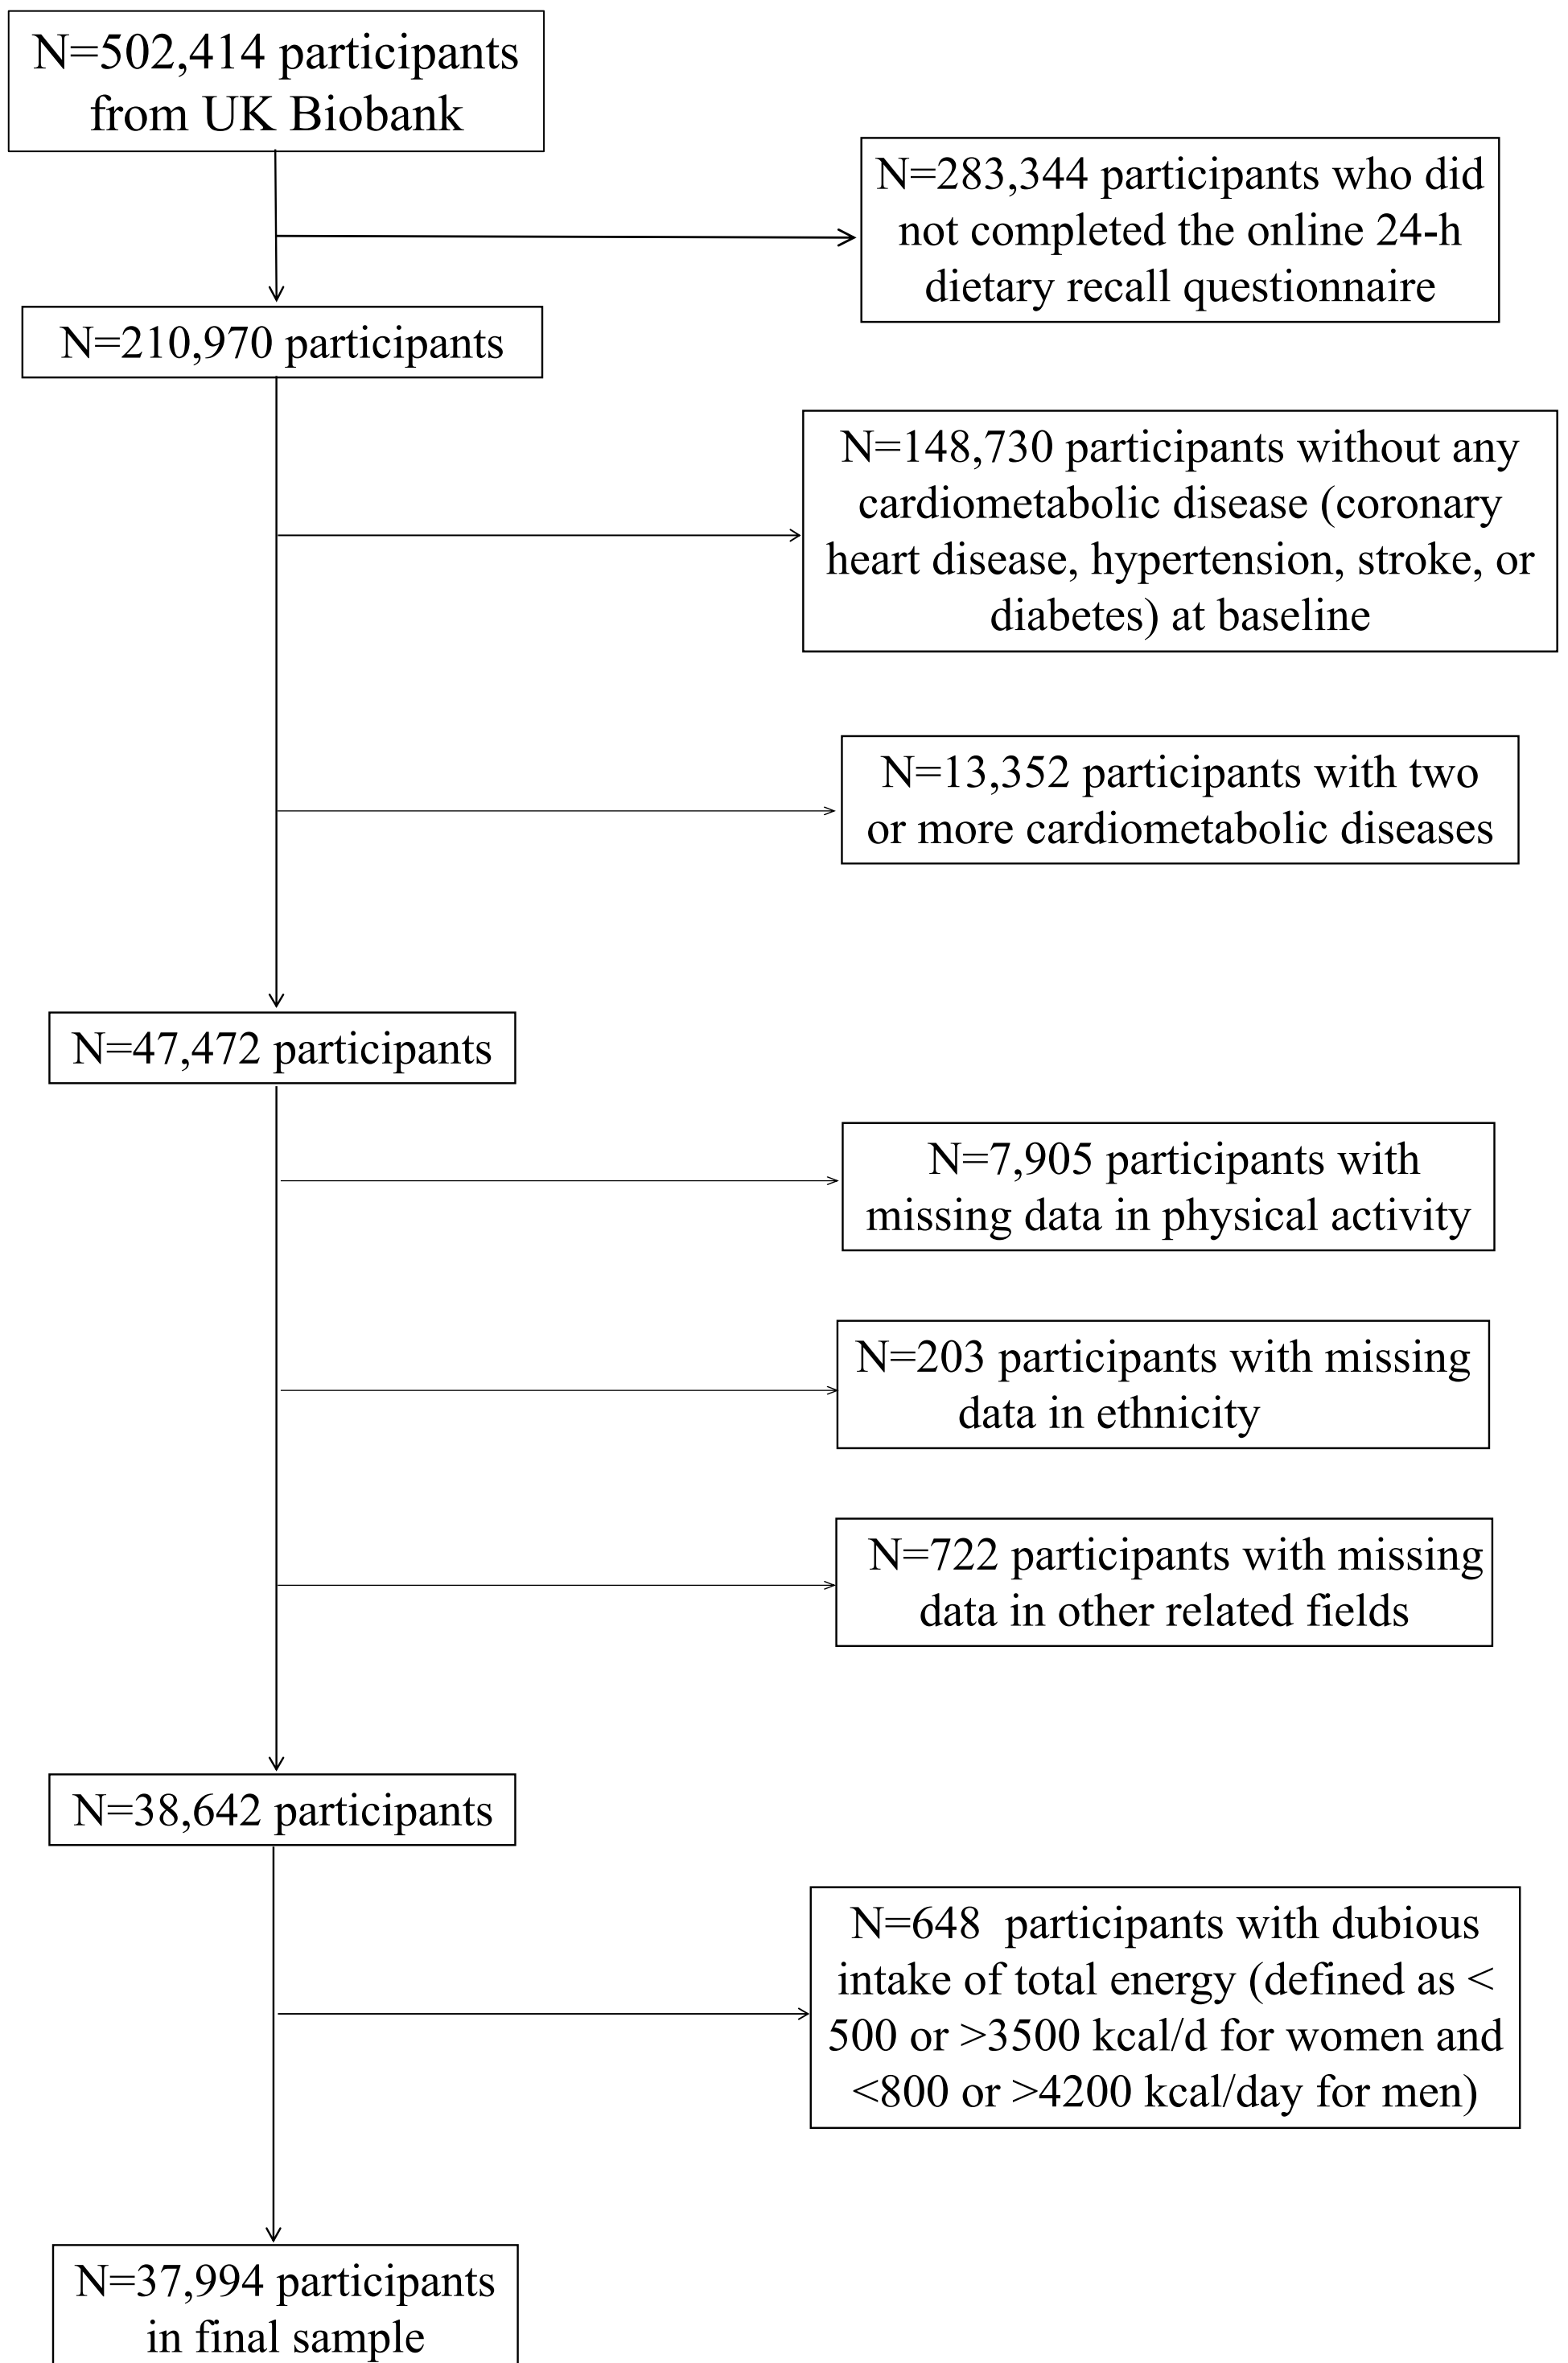

Supplement: 12916_2022_2456_MOESM1_ESM.pdf [file 12916_2022_2456_MOESM1_ESM.pdf]
